# Supplementary material for: Affective responses in mountain hiking—A randomized crossover trial focusing on differences between indoor and outdoor activity
Source: PubMed Central journal article supplement (PMC5433751; doi:10.1371/journal.pone.0177719), 2017-05-16

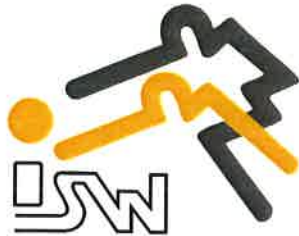

Fürstenweg 185  
6020 Innsbruck

INSTITUT FÜR  
SPORTWISSENSCHAFTEN  
DER UNIVERSITÄT INNSBRUCK

**Chairman**  
**Univ.-Prof. Dr.**  
**Elmar KORNEXL**

**Review Board for sports scientific  
research projects**

Members:

Univ.-Prof. Dr. Elmar Kornexl  
Univ.-Prof. DDr. Martin Burtscher  
o.Univ.-Prof. Dr. Werner Nachbauer  
Univ.-Ass. Dr. Barbara Hotter  
Univ.-Prof. Dr. Martin Kopp  
Univ.-Prof. Dr. Anna Buchheim

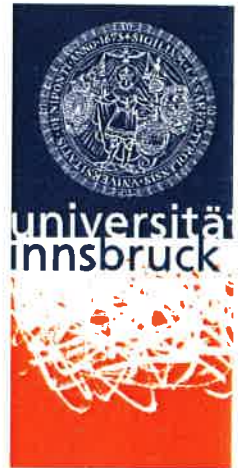

Innsbruck, 22.04.2015  
ZI. 025/2015

Documentation:

Project description:

*Effekte des Bergsports auf die individuelle Lebensqualität  
und Gesundheit*

Version/Date:

22.04.2015

Proband information:

yes

Version/Date:

22.04.2015

Cost report:

yes

Confirmation of insurance coverage  
(Probands/Testers):

yes

Necessary revision:

Due to the presentation and documentation of the project of *Prof. Martin Kopp* there  
are no further objections to start this research project.

Chairman

*E. Kornexl*

Univ.-Prof. Dr. Elmar Kornexl

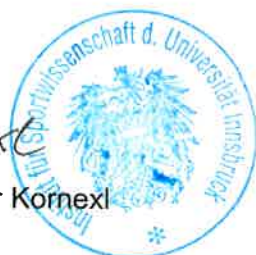

Supplement: pone.0177719.s002.pdf [file pone.0177719.s002.pdf]
