# Supplementary material for: Affective responses in mountain hiking—A randomized crossover trial focusing on differences between indoor and outdoor activity
Source: PubMed Central journal article supplement (PMC5433751; doi:10.1371/journal.pone.0177719), 2017-05-16
Supplement: pone.0177719.s004.pdf [file pone.0177719.s004.pdf]

# **Study protocol English**

## **Participant recruitment**

Participant recruitment will be done on a voluntary basis by public announcements. Insurance will be taken out to cover possible accidents.

## **Inclusion criteria**

- Age between 18 and 60 years
- Voluntary participation
- Ability to be physically active for a 3hours mountain hiking tour assessed by the Physical Activity Readiness Questionnaire (Shephard et al. 1991)

## **Exclusion criteria**

- Pregnancy
- Breast-feeding
- Chronic or acute diseases (already existing or diagnosed during the study)

## **Sample size calculation**

The required sample size was based on an a priori power analysis with the following assumptions. The effect size was set to  $d = 1.3$ ,  $\alpha = 0.05$ , Power = 0.8 According to the power analysis, 25 subjects were necessary. A dropout rate of 20% was included and resulted in a minimum of 30 subjects.

To protect this calculation, a pilot study will be conducted and the effect size will be adapted accordingly.

## **Details of the interventions**

- (1) An outdoor mountain hiking condition with uphill and downhill walking phase around Innsbruck with duration of approximately 3 hours, approximately 700 altitude meters, and in a moderate walking intensity, RPE: 11-14.
- (2) An indoor treadmill walking condition adapted to the outdoor mountain hiking condition regarding duration, inclination, intensity and rests.
- (3) A sedentary control condition without physical activity with access to computers, RPE: 6. Duration is identical to the physical exercise conditions.

## **Outcome measures**

Psychological: Mood survey scale (Befindlichkeitsskalen, Abele-Brehm et al. 1986; State Trait Anxiety Inventory, Spielberger et al. 1970) Feeling Scale (Hardy et al. 1989), Felt Arousal Scale (Svebak et al. 1985), Quality of life (World Health Organization 1998).

Physiological: Blood pressure, Saliva Sampling (Cortisol), Heart rate

## **Data collection**

Psychological data will be collected in questionnaires at 3 (5 for Feeling Scale and Felt Arousal Scale) measurement points in each condition, before, at rest, and after the interventions.

Physiological data will be collected at 3 measurement points in each condition, before, at rest, and after the interventions.

## **Plans for data analysis**

3 x 3 repeated measures ANOVAs (time by condition, both within-subject factors) or Friedman Test, as appropriate.
